# Supplementary material for: Computational Evidence of NAGNAG Alternative Splicing in Human Large Intergenic Noncoding RNA
Source: Biomed Res Int. 2014 Jun 5;2014:736798. doi: 10.1155/2014/736798 (PMC4068082; doi:10.1155/2014/736798)
Supplement: Supplementary file 1 — Supplementary Figure S1: The exon and intron length of protein-coding gene versus lincRNA. Supplementary Table S1: Occurrence of NAGNAG acceptors in human long non-coding RNA. Supplementary Table S2: Disease association of the lincRNA-neighboring genes. Supplementary Data 1: lincRNA that overlap with protein-coding RNA. [file 736798.f1.zip]

Archive with 4 entries (3 files):
- 736798.f1/
- 736798.f1/mat.736798.v1.doc
- 736798.f1/mat.736798.v2.doc
- 736798.f1/mat.736798.v3.doc
